# Supplementary material for: The amino-terminus of the hepatitis C virus (HCV) p7 viroporin and its cleavage from glycoprotein E2-p7 precursor determine specific infectivity and secretion levels of HCV particle types
Source: PubMed Central journal article supplement (PMC5749900; doi:10.1371/journal.ppat.1006774), 2017-12-18

A JFH1 HAHALp7 virus

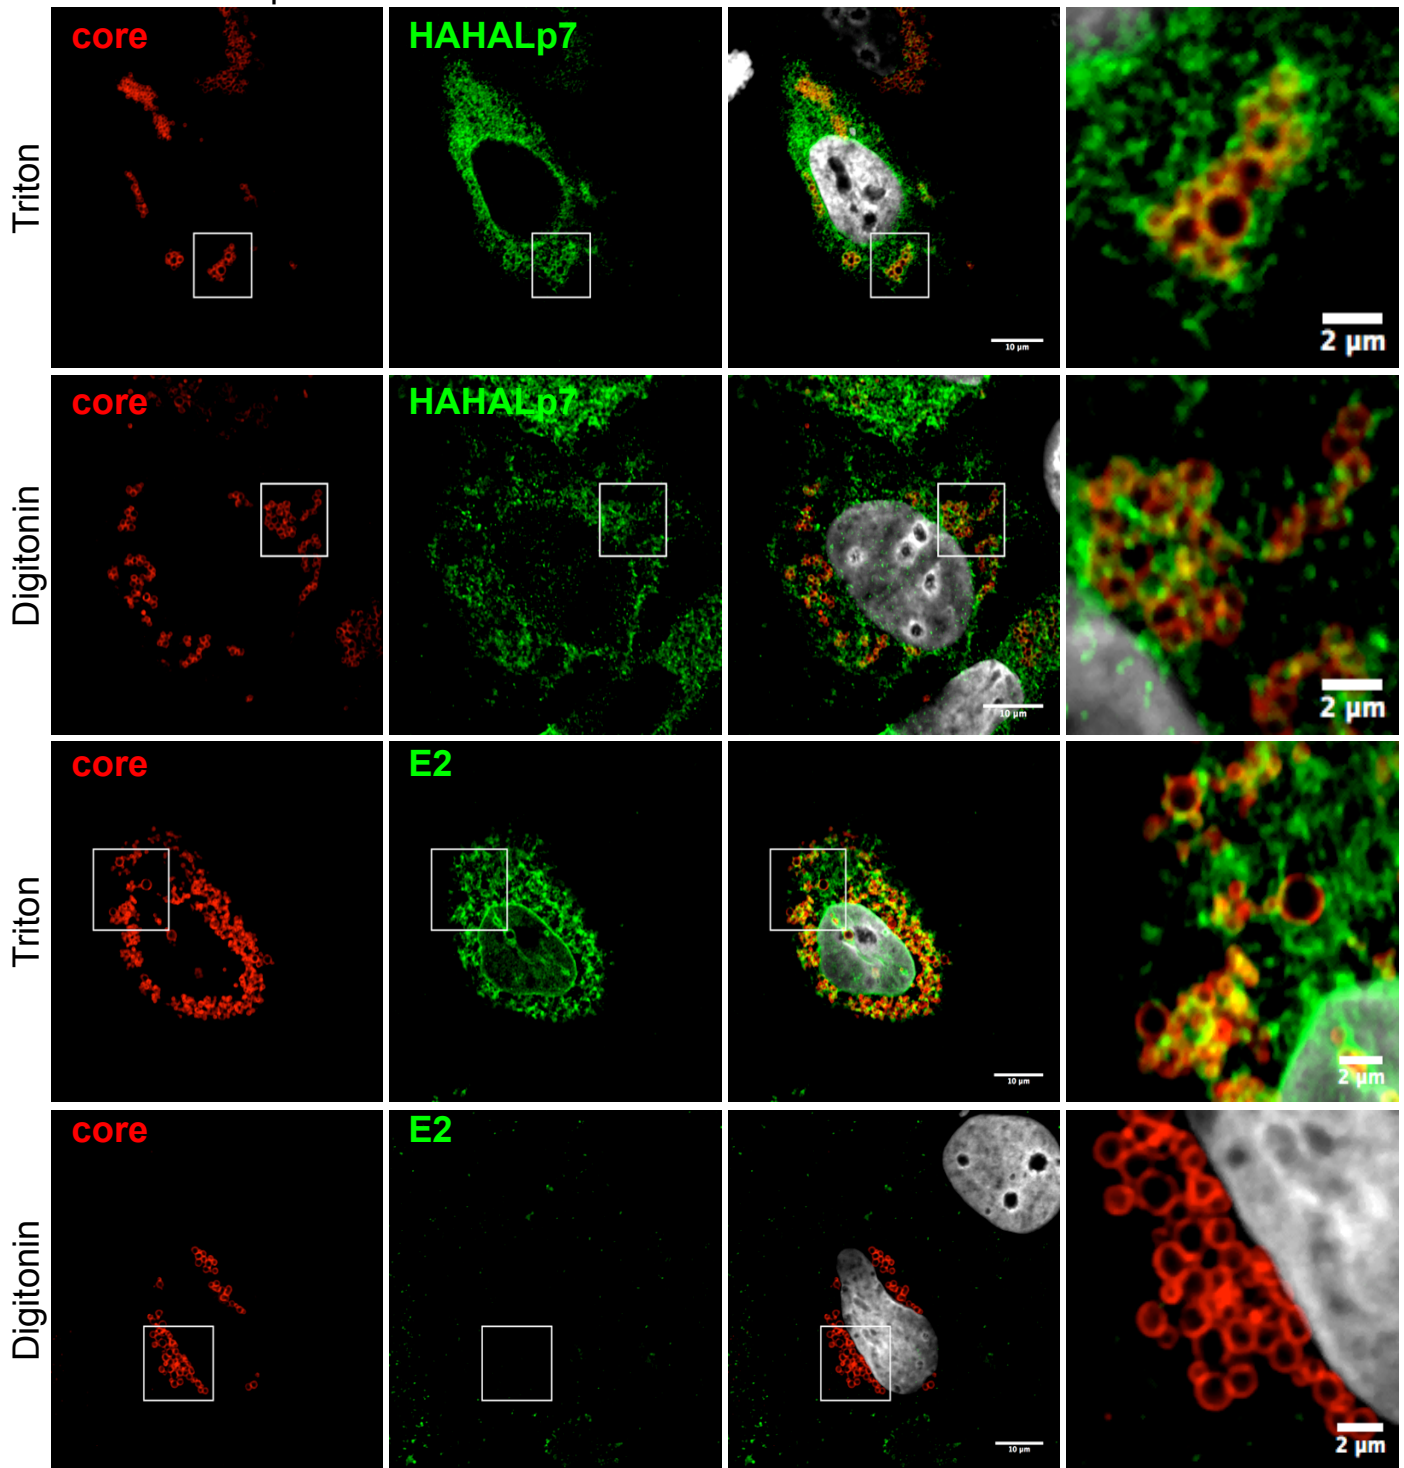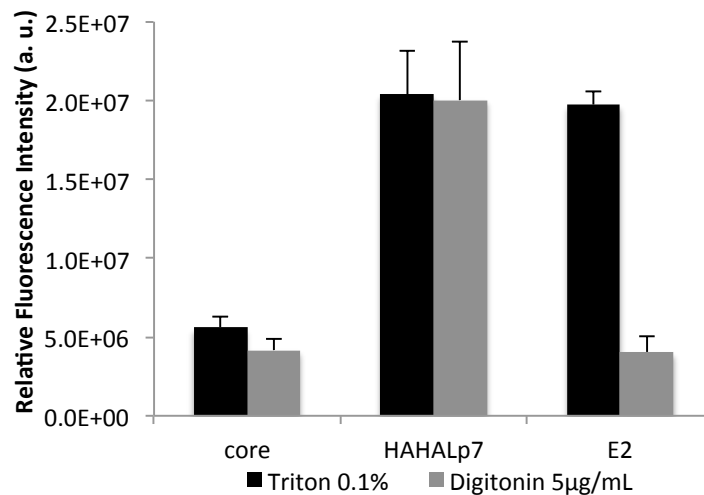

**B** C-E1E2 + noSPHAHALp7

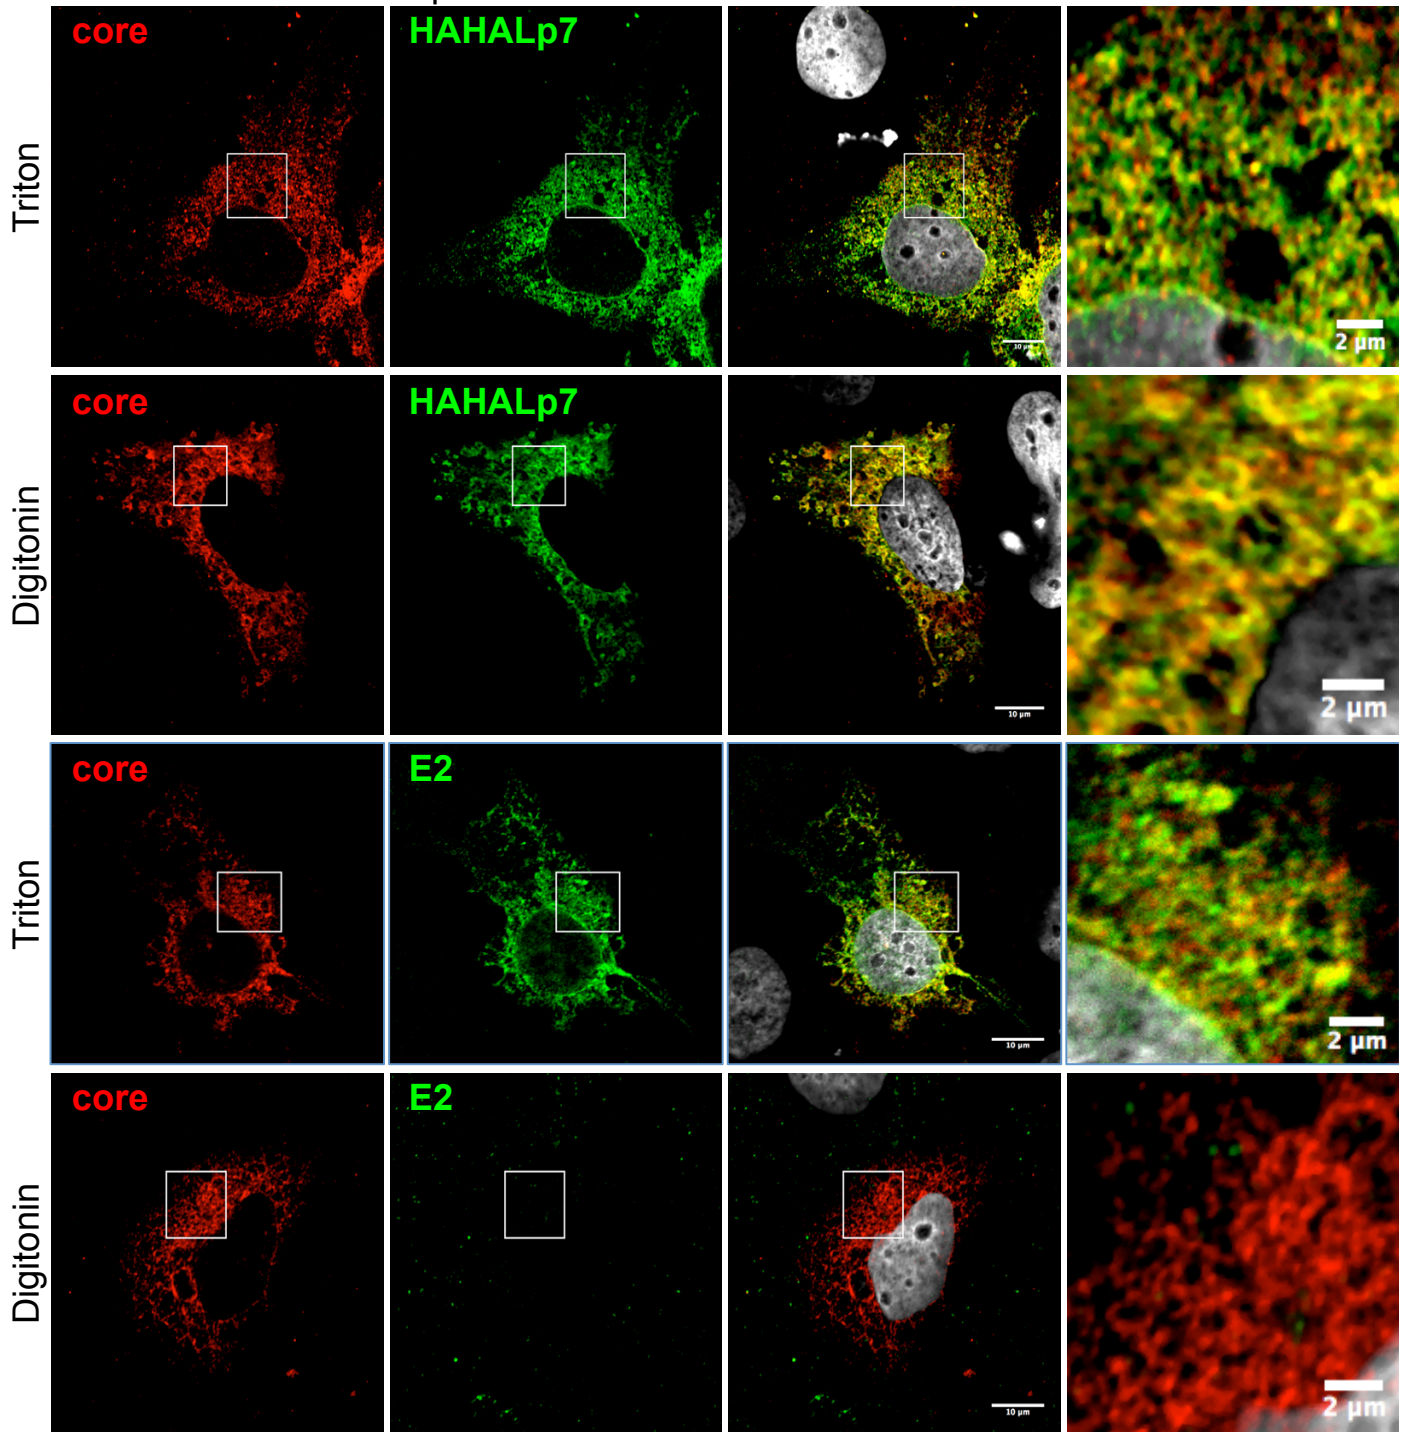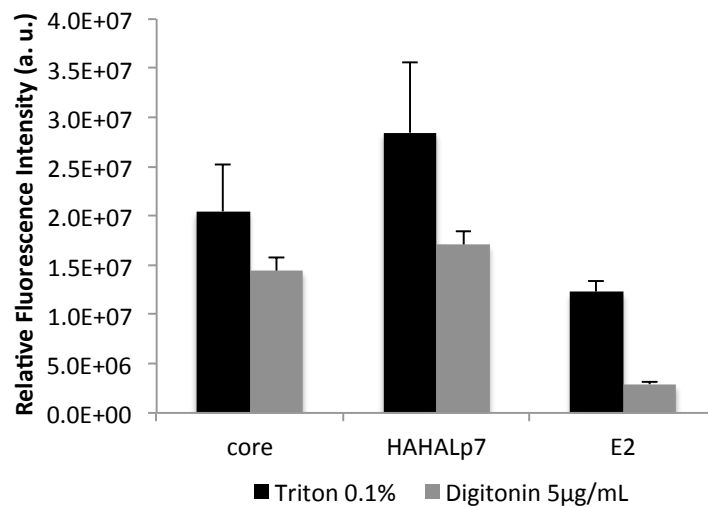

C C-E1E2 +  $\Delta$ E2HAHALp7

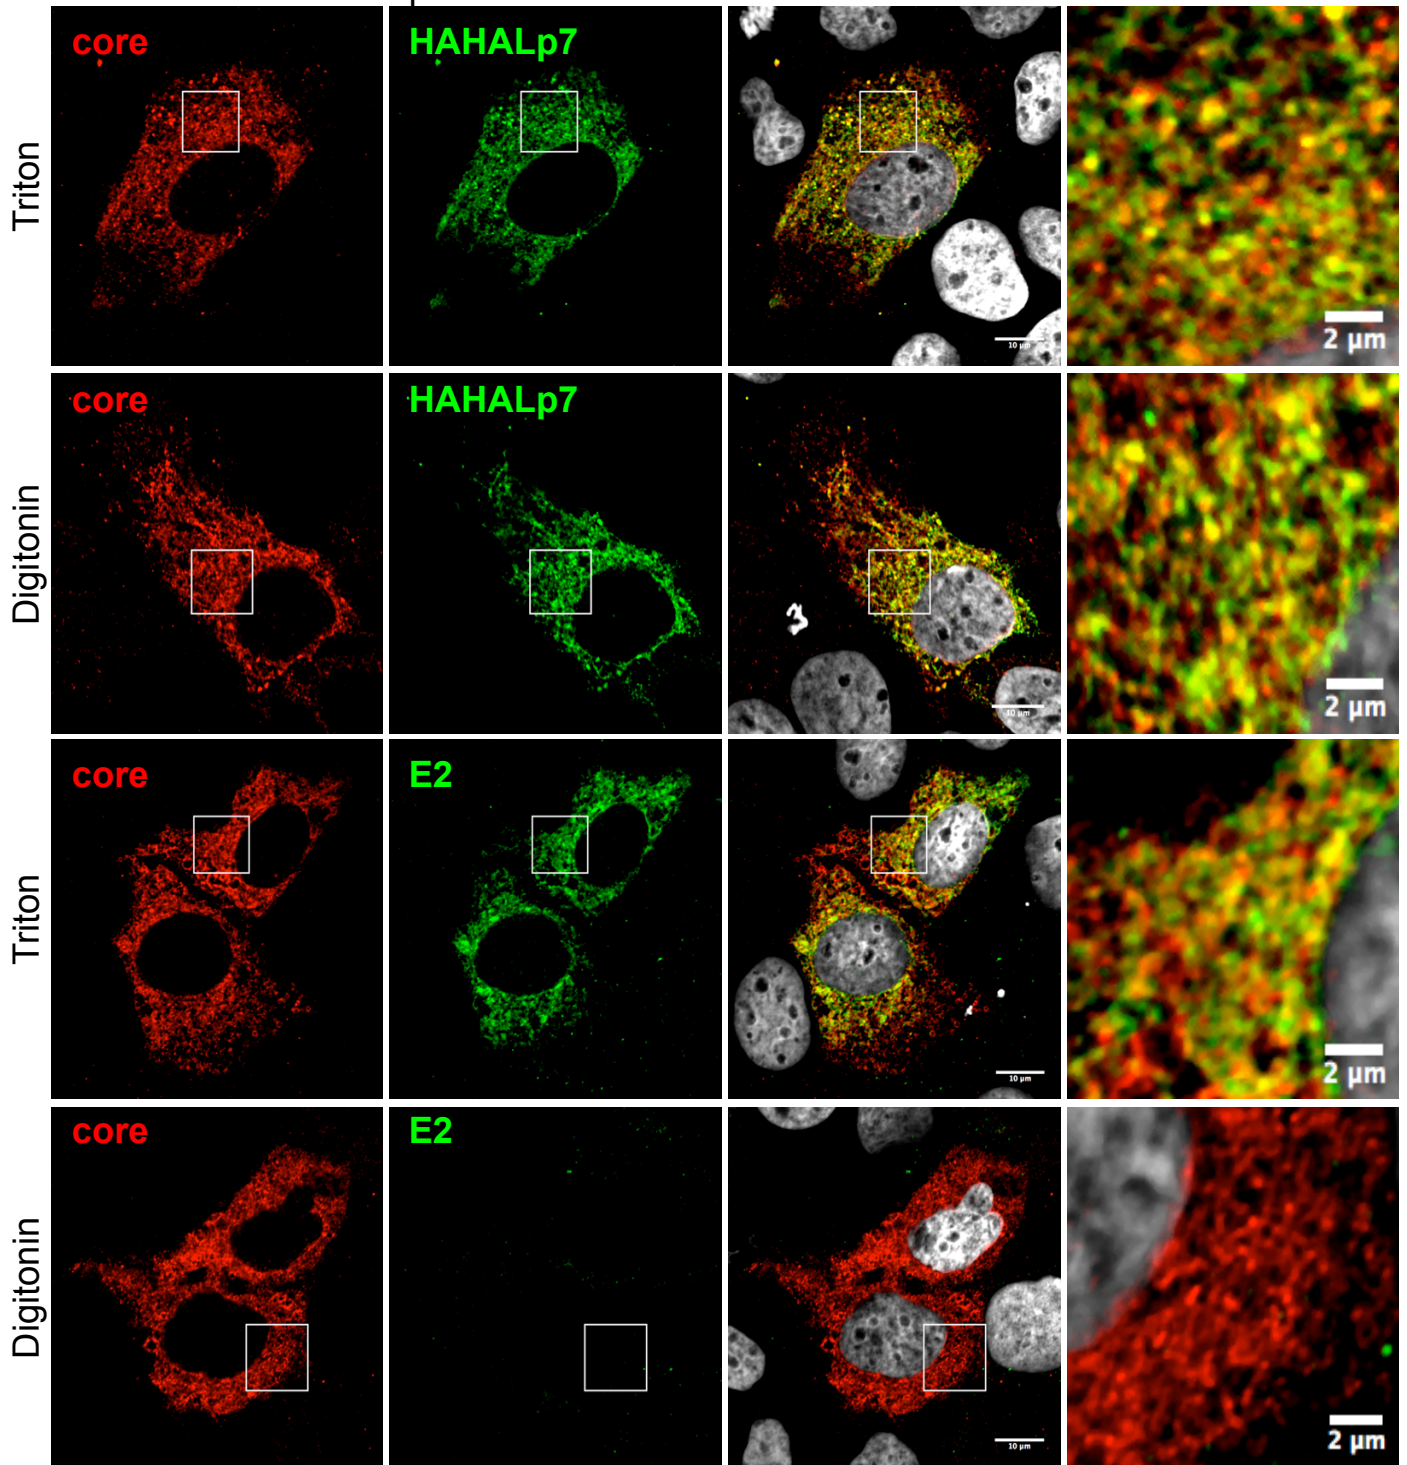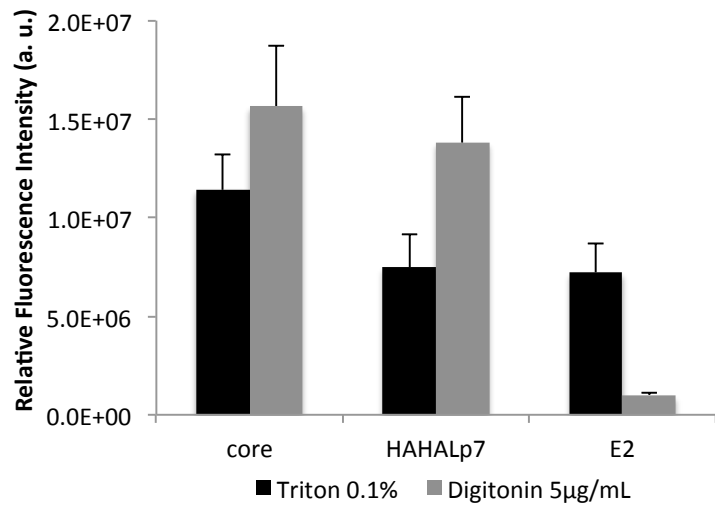

Supplement: ppat.1006774.s009.pdf [file ppat.1006774.s009.pdf]
